# Supplementary material
Source: Springer Nature journal article supplement (https://www.springermedizin.de/resource/supplementary/12879_2013_2974_MOESM2_ESM.pdf/9446240)
Supplement: MOESM2 [file 9446240]

**CD386**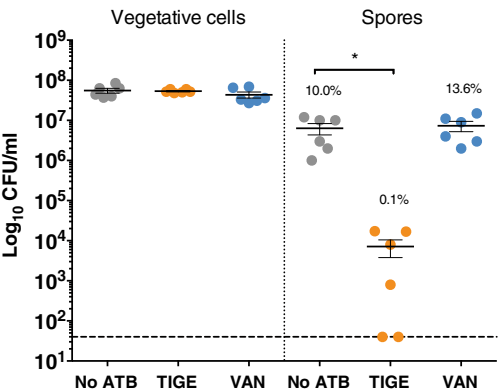

| % spores in microscopy |           | (Time)     |
|------------------------|-----------|------------|
| 2.1                    | 0.0       | 0.5 (48h)  |
| 24.2                   | 5.9 (***) | 19.1 (96h) |

**CD392**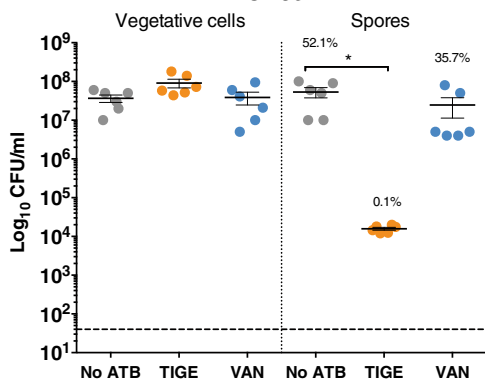

| % spores in microscopy |            | (Time)     |
|------------------------|------------|------------|
| 19.9                   | 0.1        | 10.2 (48h) |
| 86.3                   | 4.1 (****) | 79.6 (**)  |

**CD398**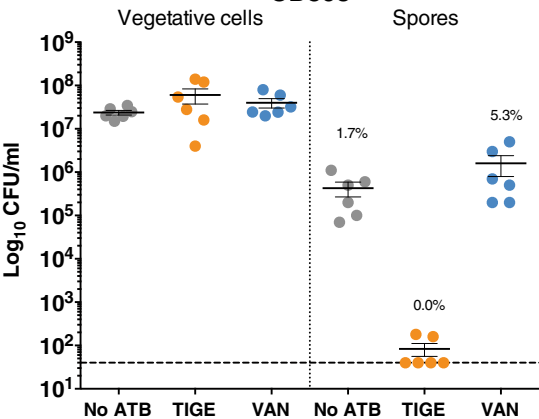

| % spores in microscopy |            | (Time)     |
|------------------------|------------|------------|
| 0.4                    | 0.0        | 2.1 (48h)  |
| 22.6                   | 3.0 (****) | 24.0 (96h) |

**CD400**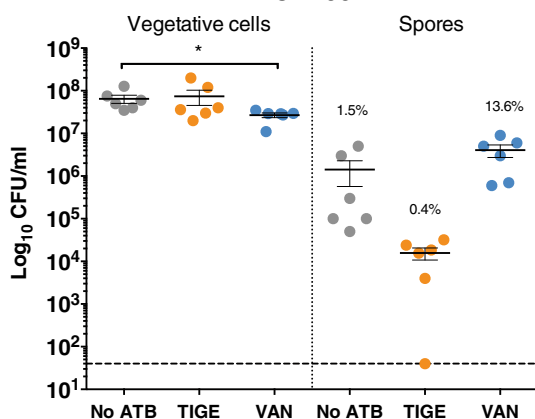

| % spores in microscopy |            | (Time)    |
|------------------------|------------|-----------|
| 5.2                    | 0.0        | 8.4 (48h) |
| 64.2                   | 4.2 (****) | 46.3 (**) |
